# Supplementary material for: Efficacy of exon-skipping therapy for DMD cardiomyopathy with mutations in actin binding domain 1
Source: PubMed Central journal article supplement (PMC10654596; doi:10.1016/j.omtn.2023.102060), 2023-10-19
Supplement: mmc1.pdf [file mmc1.pdf]

**Supplemental information**

**Efficacy of exon-skipping therapy for DMD**

**cardiomyopathy with mutations**

**in actin binding domain 1**

**Naoko Shiba, Xiao Yang, Mitsuto Sato, Shin Kadota, Yota Suzuki, Masahiro Agata, Kohei Nagamine, Masaki Izumi, Yusuke Honda, Tomoya Koganehira, Hideki Kobayashi, Hajime Ichimura, Shinichiro Chuma, Junichi Nakai, Shugo Tohyama, Keiichi Fukuda, Daigo Miyazaki, Akinori Nakamura, and Yuji Shiba**

## Supplemental Tables

**Table S1. List of primers for genomic PCR and RT-PCR**

| <b>genomic PCR</b>                                  | <b>Forward primer (5'→3')</b>      | <b>Reverse primer (5'→3')</b>     |
|-----------------------------------------------------|------------------------------------|-----------------------------------|
| P1 (AAVS1 intron1)                                  | CTCTTCTCTGTTTCAGCCCTAAGAATC        |                                   |
| P2 (AAVS1 intron1)                                  |                                    | CATAGCTCAGTCTGGTCTATCTGCC         |
| P3 (Puro)                                           |                                    | CGCGCGTGAGGAAGAGTTCTTG            |
| P4 (R-CaMP1.07)                                     | ATGGGTTCTCATCATCATCATCATCATGGTATGG |                                   |
| DMD exon1-exon11                                    | GATCACTCACTTTCCCCCTACAG            | TGAGGCATTCCCATCTTGAATTTAG         |
| DMD exon1-exon 6                                    | GGCAATTACCTTCGGAGAAAAACG           | TTACATTTTTGACCTGCCAGTGGA          |
| Off-target sequencing for <i>MEF2C-AS1</i>          | AGCTAGGATTTTTAGGAGTGAGCAA          | TTGAGAGGGAGTGCTATAAACACAA         |
| Off-target sequencing for <i>CCIN</i>               | GGTGCTTGGTGAAGGTTATATCTC           | GATTGATGGTGTAGTCCTTTGTCTG         |
| Off-target sequencing for <i>POLR2K</i>             | CTGGGAATTCAGAGGAATGTCTTCA          | GGGAAGCAACTTTACCCTTTATTGT         |
| Off-target sequencing for <i>NRF1</i>               | TTTGTTATCTGTGCTGAATTTGGGA          | GTTCTGACATACTAATCCATGAATCTT       |
| Off-target sequencing for <i>LINC00661</i>          | AACGATGACTAGGATGATGAGTGAG          | AAACCAAGAGTCTAAAGGCACAAAG         |
| Off-target sequencing for <i>TOM1L1</i>             | TAGTTATTCTTTGTGTGTCGCACTG          | TTAAGGTGTCTTCCATCTCCAAACT         |
| Off-target sequencing for <i>PARP16</i>             | CAATGTAAAACTGTGGTAGTGGCT           | TAGTCTTTGCTGAGTAAAAGGGGAA         |
| Off-target sequencing for <i>ENHO/RP11-296L22.8</i> | CAGGGTAGAGCCATAGTTCATTTA           | CTCACCTAGAGCCTGGAATTAGGAT         |
| Off-target sequencing for <i>KLHL4-ACA64</i>        | TGAATTGGAGCCTGAACAACCTTAC          | TTATATTCATATACCTAAATCTTTTCACTTGCC |
| Off-target sequencing for <i>VIT</i>                | CTAATGGTGACACTGGAGGATTTGA          | GGAAATCTCAAACCTTTTGGTGAGG         |
| Off-target sequencing for <i>MAS1</i>               | GAAATACATTTGGCCACCAGTAGAG          | TGAGCAAAAATATCAGAGTCCTCCA         |
| Off-target sequencing for <i>SLAIN2</i>             | ATGTACTAGTGCCCAATCATCAGTT          | TGGTTAGAGTAGCGCTGTTGATATT         |
|                                                     |                                    |                                   |
| <b>RT-PCR</b>                                       | <b>Forward primer (5'→3')</b>      | <b>Reverse primer (5'→3')</b>     |
| DMD exon2 - exon12                                  | CATTCACAAAATGGGTAATGCACA           | AAGCACCTTATGTTGTTGACTTGG          |
|                                                     |                                    |                                   |
| <b>qRT-PCR</b>                                      | <b>Forward primer (5'→3')</b>      | <b>Reverse primer (5'→3')</b>     |
| <i>TNNT2</i>                                        | TTCACCAAAGATCTGCTCCTCGCT           | TTATFACTGGTGTGGAGTGGGTGTGG        |
| <i>MYH6</i>                                         | CTCAAGCTCATGGCCACTCT               | GCCTCCTTTGCTTTTACCCT              |
| <i>MYH7</i>                                         | ACAAGCTGCAGCTAAAGGTC               | TCAAGATGTGGCAAAGCTAC              |
| <i>TNNI1</i>                                        | CTCTTCAGCAAGAGTTTGCG               | CAGCTCCACGAGGACTGAAC              |
| <i>TNNI3</i>                                        | CAGTAGGCAGGAAGGCTCAG               | CCTCAAGCAGGTGAAGAAGG              |
| <i>MYL7</i>                                         | GTCTTCCTCACGCTCTTTGG               | CCACCTCAGCTGGAGAGAAC              |
| <i>MYL2</i>                                         | TTGGGCGAGTGAACGTGAAAA              | CCGAACGTAATCAGCCTTCAG             |
| <i>ATP2A2</i>                                       | CATGACAACCCACTGAGAAGAGAA           | CGAAGGTCAGATTGGTCTCATATTT         |
| <i>RYR2</i>                                         | CTGCGCCATTCCATAGTGG                | AGTTGAAGACCGGGAGGTG               |
| <i>CASQ2</i>                                        | AAAGACCCACTTACGTGCGC               | CAGGAATTCGTAGCCATCTGGA            |
| <i>CACNA1C</i>                                      | CATGCTCACGGTGTTC                   | TCCTACGGCATCATTGACC               |
| <i>SCN5A</i>                                        | GAGCAACTTGTCCGGTGCTG               | GATTTGGCCAGCTTGAAGAC              |
| <i>KCNJ2</i>                                        | GGTTTGCTTTGGCTCACTCG               | GAACATGTCTGTTGCTGGC               |
| <i>KCNJ4</i>                                        | TAAACTTGGCCCTGCGTCTT               | CTTCTTGACGAAGCGGTTGC              |
| <i>KCND3</i>                                        | TGGCTTCGCGGAAGGGTTT                | TGGTGACTCCAGCTCTTGGG              |
| <i>DES</i>                                          | CTGAGCAAAGGGGTTCTGAG               | ACTTCATGCTGCTGCTGTGT              |
| <i>SPARC</i>                                        | TTCGGCATCAAGCAGAAGGA               | GAAACACGAAGGGGAGGGTT              |
| <i>ALPK3</i>                                        | CTGAGGCCATGCAGAAATGC               | ATCTTCCAGTCAACCCCTGC              |
| <i>ANKRD1</i>                                       | TCAAGAACTGTGCTGGGAAG               | TAGCTATGCGAGAGGTCTTG              |
| <i>NPPA</i>                                         | TCCAACGCAGACCTGATGGA               | GGGCACGACCTCATCTTCTA              |
| <i>NPPB</i>                                         | TGGAAACGTCCGGGTTACAG               | CTTCCAGACACCTGTGGGAC              |
| <i>GAPDH</i>                                        | ATGGAAATCCCATCACCATCTT             | CGCCCCACTTGATTTTGG                |

**Table S2. DMD sgRNA target sequence**

| name   | region   | target sequence                 |     | guide sequence + PAM            |                            |
|--------|----------|---------------------------------|-----|---------------------------------|----------------------------|
| sgRNA1 | intron 2 | <b>ccg</b> tcatcttcggcagattaatt | rev | AATTAATCTGCCGAAGATGA <b>CGG</b> | chrX:32,849,933-32,849,955 |
| sgRNA2 | intron 7 | <b>ccc</b> tatggatggagcatactgca | rev | TGCAGTATGCTCCATCCATA <b>GGG</b> | chrX:32,809,222-32,809,244 |
| sgRNA3 | intron 9 | <b>cct</b> cgtgaagagctggtttgttt | rev | AAACAAACCAGCTCTTCACG <b>AGG</b> | chrX:32,697,747-32,697,769 |

PAM; protospacer adjacent motif

**Table S3. Potential candidate off-target exonic loci with CFD off-target score more than 0.02.**

Off-target sequence is shown with mismatch to sgRNA sequence shown in red.

|        | Sequence + PAM                                                              | CFD Score |                          | Associated Gene           |
|--------|-----------------------------------------------------------------------------|-----------|--------------------------|---------------------------|
| sgRNA1 | ACTTAAT <b>TT</b> GTCTGAA <b>AA</b> TGA <b>AGG</b>                          | 0.3702    | chr5:88943055-88943077   | <i>MEF2C-AS1</i>          |
|        | AAT <b>CA</b> ATCTGC <b>AGA</b> AGGTGA <b>AGG</b>                           | 0.0816    | chr9:36170969-36170991   | <i>CCIN</i>               |
|        | AAT <b>GT</b> ATCT <b>CC</b> CGAAGAT <b>AA</b> <b>GGG</b>                   | 0.0649    | chr8:100153416-100153438 | <i>POLR2K</i>             |
|        | AATT <b>AT</b> TCTGCC <b>GT</b> GGCTGA <b>TGG</b>                           | 0.0437    | chr7:129711550-129711572 | <i>NRF1</i>               |
| sgRNA2 | T <b>GG</b> ACTATGCTCCAT <b>CC</b> CA <b>GGG</b>                            | 0.0214    | chr9:34521211-34521233   | <i>ENHO/RP11-296L22.8</i> |
|        | <b>CG</b> CAG <b>C</b> AGGCTCCAT <b>C</b> AT <b>C</b> <b>CGG</b>            | 0.1299    | chr19:16026659-16026681  | <i>LINC00661</i>          |
|        | T <b>GA</b> AG <b>G</b> AGGCTCCAT <b>C</b> ACA <b>TGG</b>                   | 0.1002    | chr15:65258380-65258402  | <i>PARP16</i>             |
|        | <b>AG</b> GAGT <b>AT</b> TCTCCAT <b>CA</b> ATA <b>TGG</b>                   | 0.1244    | chr17:54915804-54915826  | <i>TOM1L1</i>             |
| sgRNA3 | <b>GG</b> CAAACCAGCTCT <b>G</b> CACG <b>TGG</b>                             | 0.1187    | chr2:36808504-36808526   | <i>VIT</i>                |
|        | AA <b>T</b> AA <b>CC</b> CA <b>C</b> CTCTT <b>C</b> AT <b>G</b> <b>GGG</b>  | 0.0692    | chr6:159908886-159908908 | <i>MAS1</i>               |
|        | AC <b>A</b> CAA <b>CC</b> CA <b>C</b> CT <b>C</b> TC <b>AC</b> C <b>TGG</b> | 0.0394    | chr4:48420247-48420269   | <i>SLAIN2</i>             |

## **Supplemental Videos**

**Movie S1. Voltage and calcium imaging of monolayered WT hiPSC-CMs on day 50.**

**A.** Voltage imaging

**B.** Calcium imaging

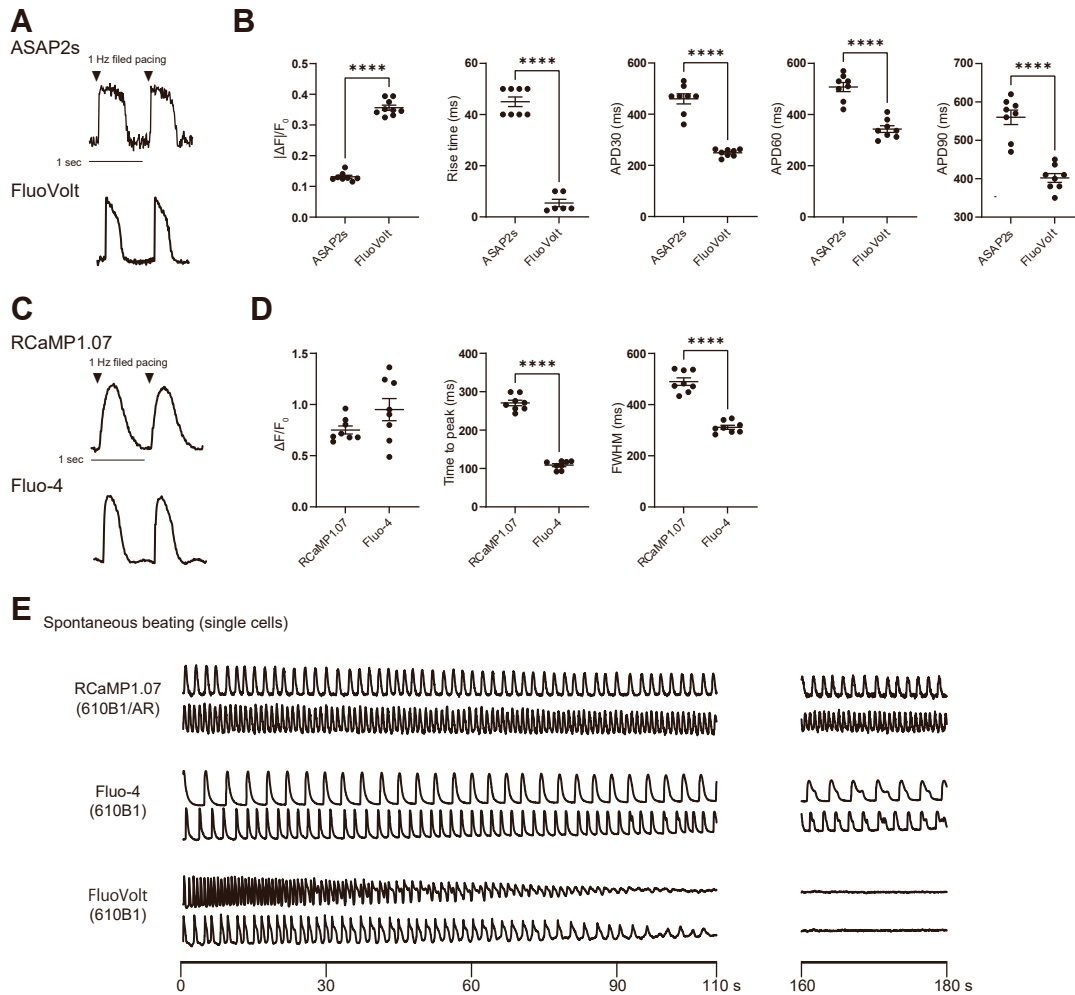

**Figure S1. Comparison of live cell imaging waveform between genetically encoded fluorescent ASAP2s/RCaMP1.07 and chemical dyes for voltage and intracellular calcium on day 28 wild-type induced pluripotent stem cell (610B1) derived cardiomyocytes (hiPSC-CMs).**

**A.** Representative traces of ASAP2s and FluoVolt imaging of a single-layered hiPSC-CMs sheet at 1 Hz field pacing. **B.**  $\Delta F/F_0$ , rise time, APD30, APD60, and APD90 (n=8). **C.** Representative traces of RCaMP1.07 and Fluo-4 AM imaging of single-layered hiPSC-CMs sheet at 1 Hz field pacing. **D.**  $\Delta F/F_0$ , Time to peak and full-width at half maximum (FWHM) (n=8). **E.** Representative traces of the single-cell spontaneous beating with RCaMP1.07 on 610B1-ASAP2s/RCaMP1.07 (619B1/AR) cell line and FluoVolt and Fluo-4 on 610B1 cell line for 180-sec traces. In the analysis with FluoVolt and Fluo-4, a decrease in waveform amplitude and the appearance of irregular rhythms were observed after approximately 1 and 2 min, respectively. Abbreviations: fluorescence (F), baseline of fluorescence (F0). Data are presented as mean  $\pm$  SEM. \*\*\*\* $P < 0.001$ .

**A**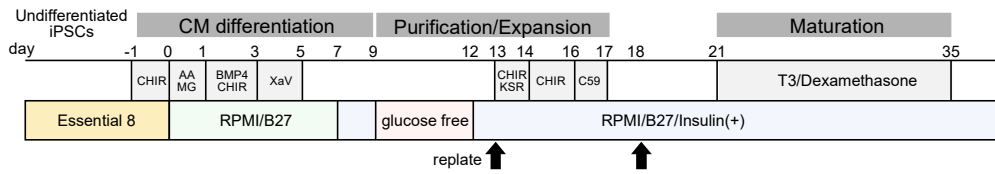**B**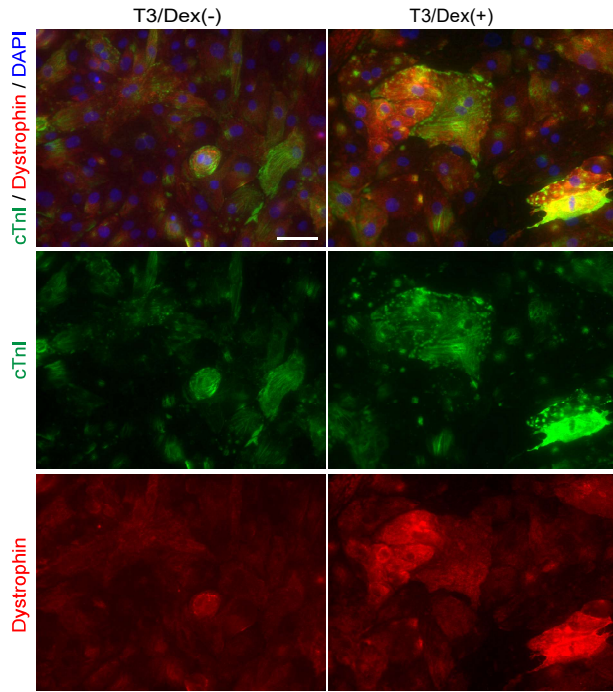**C**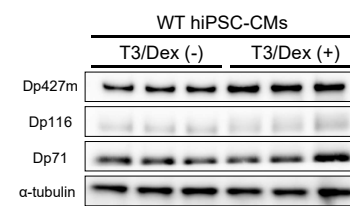**D**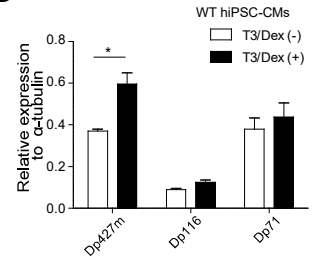**E**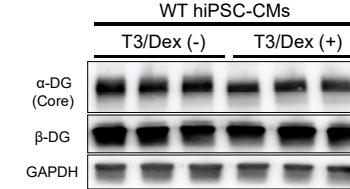**F**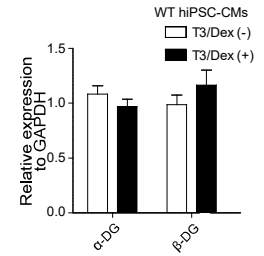**G**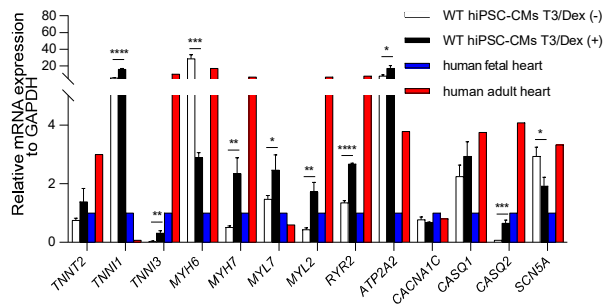**H**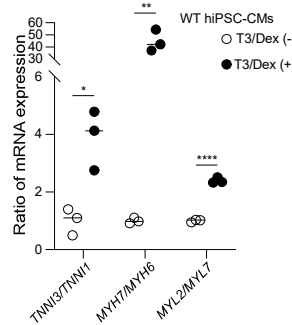**I**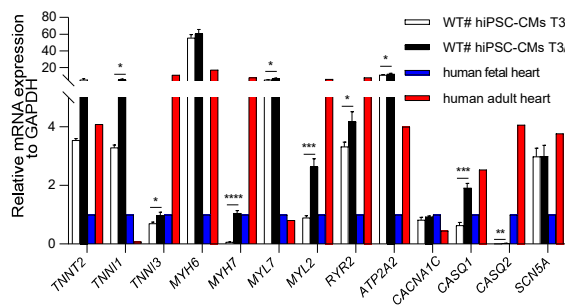**J**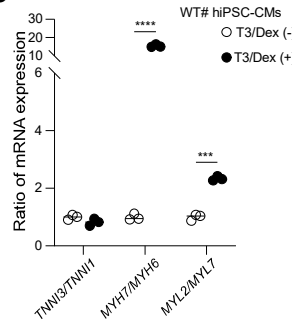

## Figure S2. Cardiac differentiation and maturation.

**A.** Protocol for cardiac differentiation, purification, expansion, and maturation. Abbreviations: AA, activin A; MG, Matrigel; CHIR, CHIR99021; T3, triiodothyronine. **B.** Immunostaining of cardiac troponin I (cTnI) (green) and full-length dystrophin (red) on day 48 isogenic WT control (WT) human induced pluripotent stem cell-derived cardiomyocytes (hiPSC-CMs) with and without T3/Dexamethasone (Dex) treatment. DNA was counterstained with DAPI. Scale bar: 50  $\mu$ m. **C, D.** Western blot analysis using the anti-dystrophin N-terminus antibody showing protein levels of three isoforms: Dp427, Dp116, and Dp71 in day 48 WT hiPSC-CMs with and without T3/Dex treatment (**C**). Quantification of protein expression in **C** (**D**). **E, F.** Western blot analysis using the anti-human dystroglycan antibody showing protein levels of  $\alpha$ -dystroglycan ( $\alpha$ -DG (core)) and  $\beta$ -dystroglycan ( $\beta$ -DG) in the same cell lysates as **C** (**E**), and quantification of protein expression in **E** (**F**). **G, I.** Relative mRNA expression of cardiac marker genes to GAPDH in day 48 WT hiPSC-CMs (**G**) and another healthy male-derived non-isogenic control hiPSC-CMs (WT#) (**I**). **H, J.** mRNA ratio of maturation marker genes, TNNI3/TNNI1, MYH7/MYH6, and MYL2/MYL7, in **G** (**H**) and **I** (**J**). Data are presented as mean  $\pm$  SEM. \*  $P < 0.05$ , \*\* $P < 0.01$ , \*\*\* $P < 0.005$ , \*\*\*\* $P < 0.001$ .

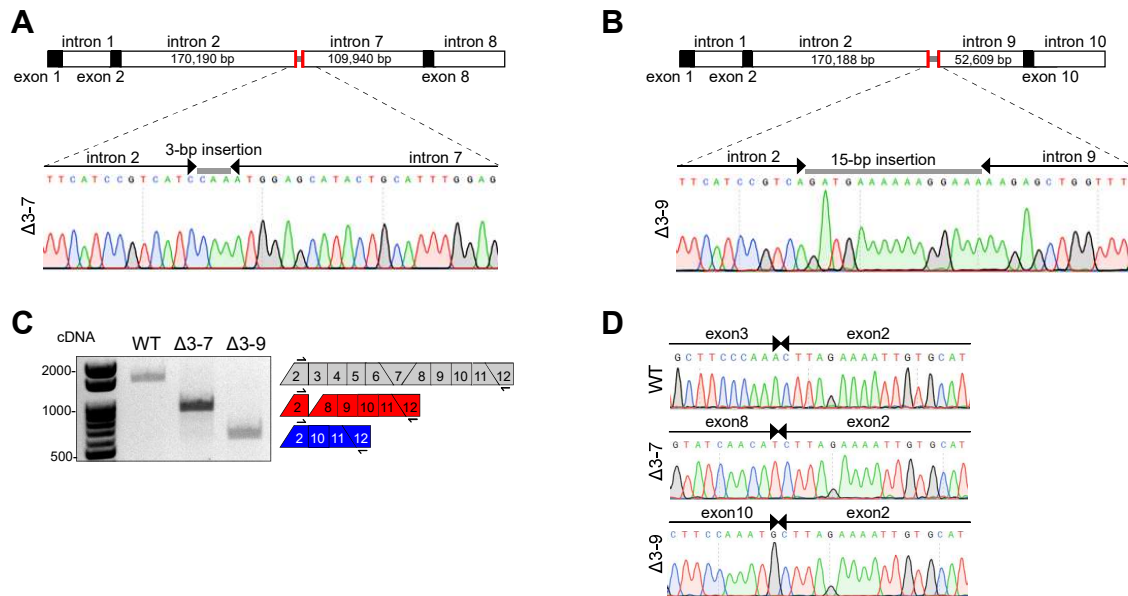

**Figure S3. Sequence analysis of isogenic control (WT),  $\Delta 3-9$ , and  $\Delta 3-7$  human induced pluripotent stem cell-cardiomyocytes (hiPSC-CMs).**

**A, B.** Sanger sequence analyses of genomic DNA extracted from  $\Delta 3-7$  (**A**) and  $\Delta 3-9$  (**B**) hiPSC-CMs, including the 5' side of intron 2 and the 3' side of the contiguous intron, shows that each cell has a 3-bp and 15-bp insertion in a deep intron close to the protospacer adjacent motif sequences. Red vertical lines indicate cut ends by Cas9.

**C.** RT-PCR analysis of CMs differentiated from ASAP2s/R-CaMP1.07-transduced WT,  $\Delta 3-7$ , and  $\Delta 3-9$  hiPSC-CMs using primers for exons 2 and 12. **D.** Sanger sequence analyses of cDNA from cardiomyocytes differentiated from iCtrl,  $\Delta 3-7$ , and  $\Delta 3-9$  hiPSC-CMs, including the 3' side of exon 2 and 5' side of the subsequent exon, showed that each cell had a correct exon deletion.



**A**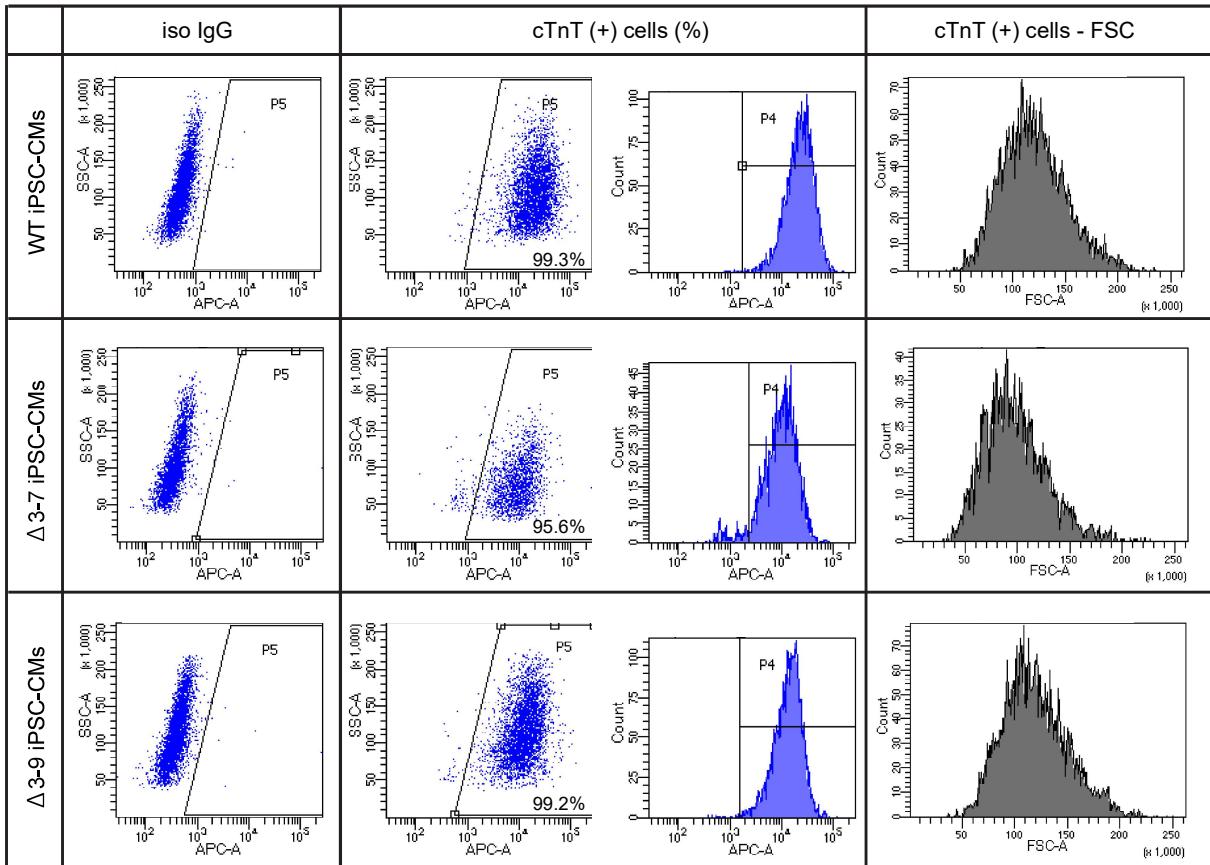**B**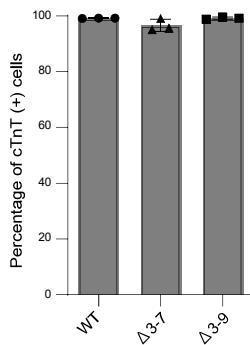**Figure S4. Flow cytometry.**

**A.** Representative flow cytometric analysis at day 48 of human induced pluripotent stem cell-derived cardiomyocytes (hiPSC-CMs) showing the percentage of cardiac troponin T (cTnT) protein expression.

**B.** Percentage of cTnT positive cells in each cell line, including WT,  $\Delta 3-7$ , and  $\Delta 3-9$  hiPSC-CMs (n=3).

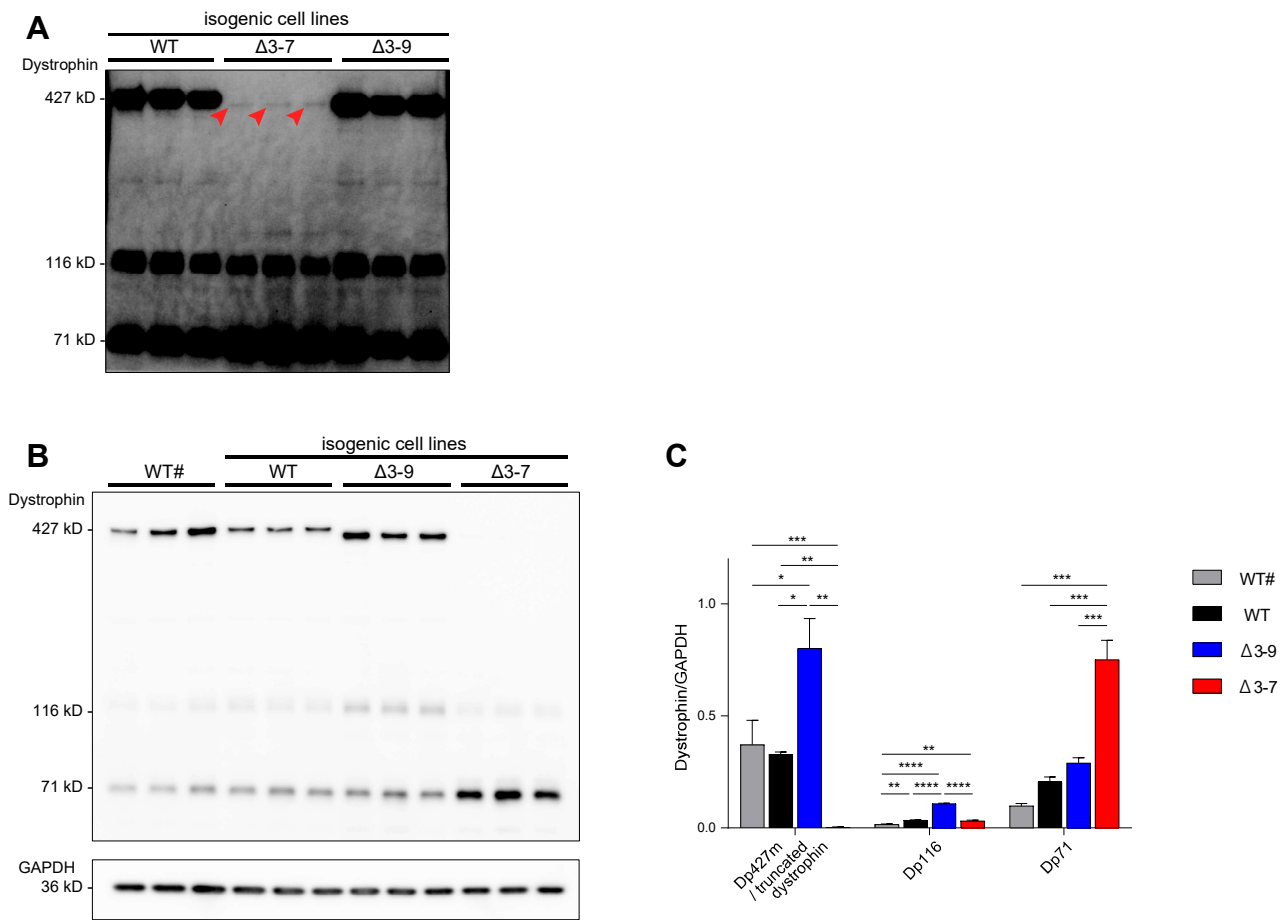

**Figure S5. Western blotting analysis.**

**A.** Strongly enhanced membrane picture of dystrophin western blotting using anti-dystrophin N-terminus antibody on Fig. 1F showing faint bands of ~395-kD internally truncated dystrophin on  $\Delta 3-7$  hiPSC-CMs with the density of approximately 0.5% of WT Dp427m (red arrowhead). **B, C.** Western blot analysis using the anti-dystrophin N-terminus antibody in day 48 WT hiPSC-CMs,  $\Delta 3-7$  hiPSC-CMs,  $\Delta 3-9$  hiPSC-CMs, and another healthy male-derived hiPSC-CMs (WT#) (**B**). Quantification of protein expression in **B** (n=3 independent cardiomyocyte differentiation batches per group) (**C**). Data are presented as mean  $\pm$  SEM. \* $P < 0.05$ , \*\* $P < 0.01$ , \*\*\* $P < 0.005$ , \*\*\*\* $P < 0.001$ .

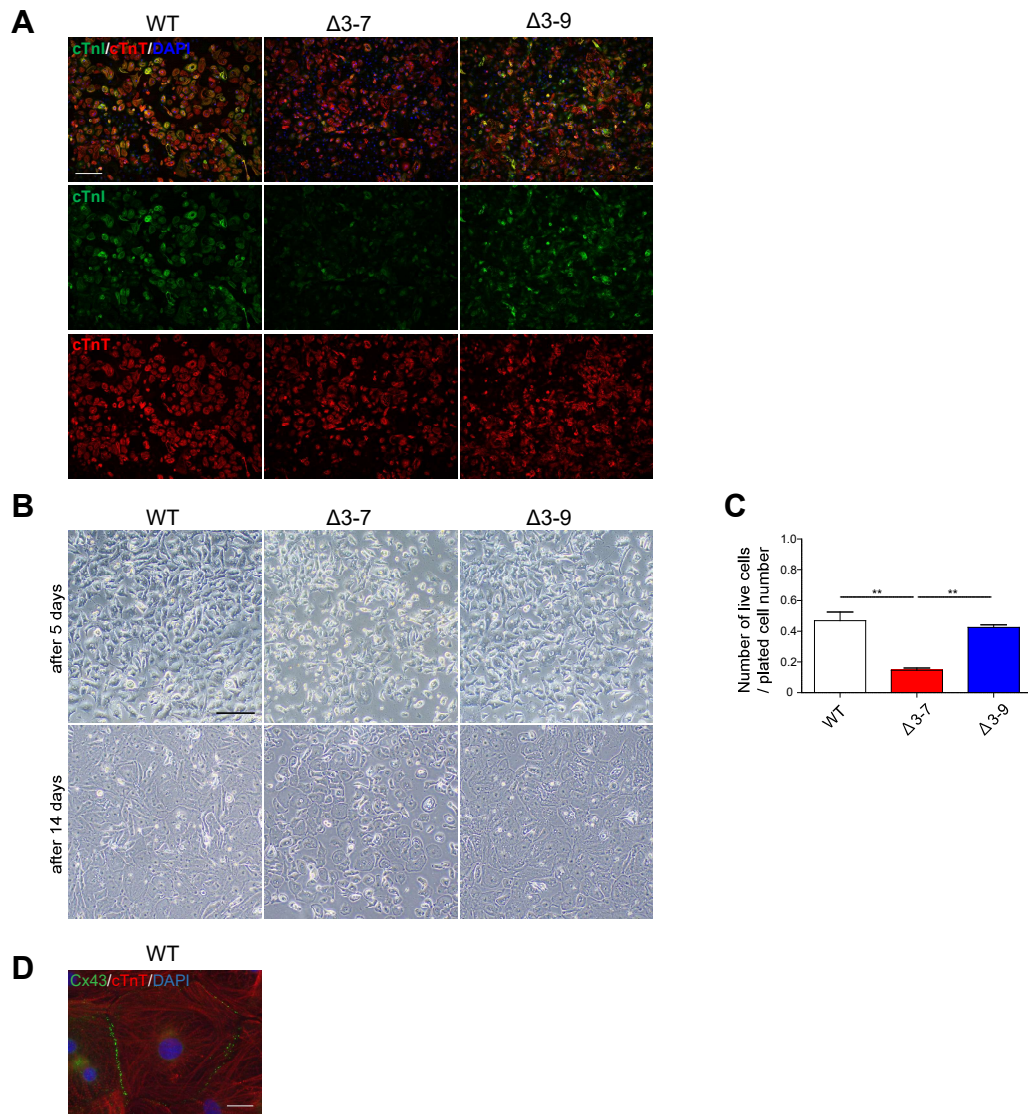

**Figure S6. Immunostaining of human induced pluripotent stem cell-cardiomyocytes (hiPSC-CMs).**

**A.** Immunostaining of cardiac troponin I (cTnI) (green) and cTnT (red) on day 48 in WT,  $\Delta 3-7$ , and  $\Delta 3-9$  hiPSC-CMs. DNA was counterstained with DAPI. Scale bar: 200  $\mu\text{m}$ .

**B.** Phase contrast microscopy images of day 35 WT,  $\Delta 3-7$ , and  $\Delta 3-9$  hiPSC-CMs at 5 d (upper) and 14 d (lower) after replating. Scale bar 500  $\mu\text{m}$ .

**C.** Ratio of the number of live cells 14 d after replating to the number of plated cells.

**D.** Immunostaining of connexin 43 (Cx43) (green) and cTnT (red) on day 48 in WT hiPSC-CMs. DNA was counterstained with DAPI. Scale bar: 20  $\mu\text{m}$ . Data are presented as mean  $\pm$  SEM. **\*\*** $P < 0.01$ .

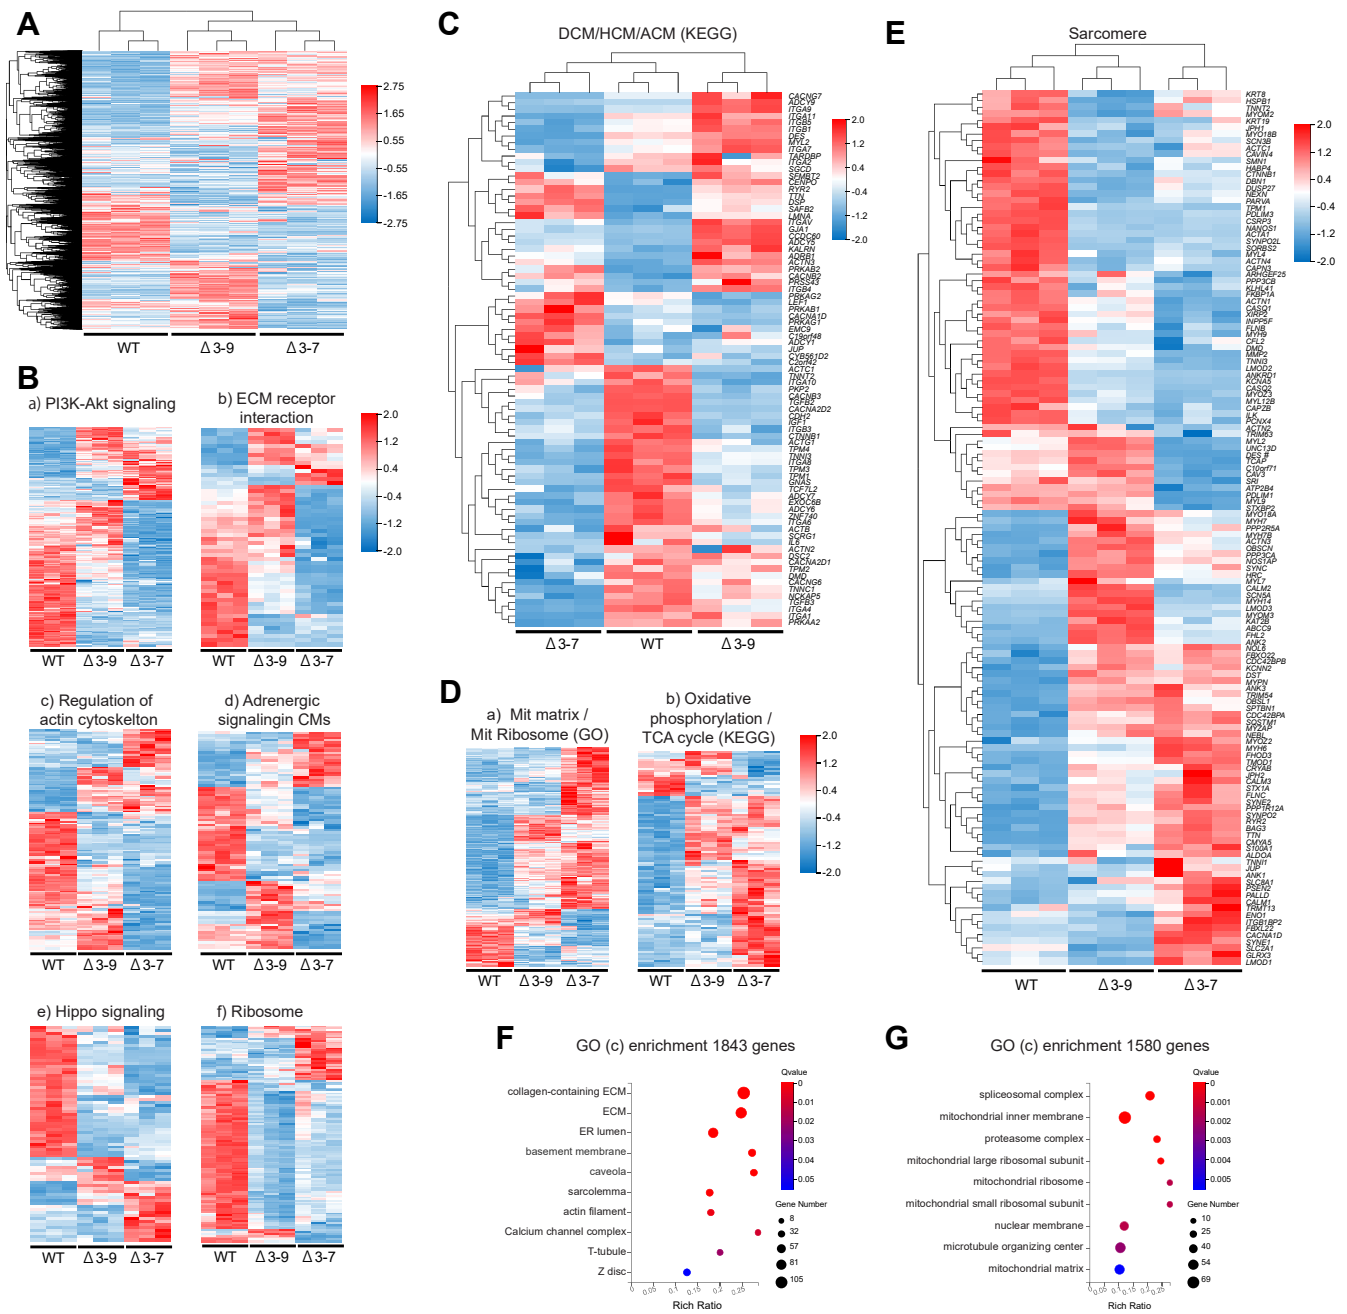

**Figure S7. RNA-seq data, related to Figure 5.**

**A.** Hierarchical clustering was performed on 10,000 genes after filtering for low expression levels and coefficients of variation. **B.** Heat map of gene normalized z-scores for log<sub>2</sub>-transformed FPKM values using the differentially expressed genes (DEGs) involved in major pathways ranked in the Kyoto Encyclopedia of Genes and Genomes pathway enrichment analysis of downregulated genes in Δ3–7 CMs in Fig. 5G, including PI3K-Akt signaling (a), ECM receptor interaction (b), regulation of actin cytoskeleton (c), adrenergic signaling in CMs (d), Hippo signaling (e), and ribosome (f). **C.** Hierarchical clustering of DEGs involved in DCM/HCM/ACM. **D.** Heat map of gene normalized z-scores for log<sub>2</sub>-transformed FPKM values using the DEGs involved in the mitochondrial matrix and mitochondrial ribosome (a) and oxidative phosphorylation and TCA cycle (b). **E.** Hierarchical clustering of DEGs involved in the sarcomere, Z-disc, I-band, M-band, and A-band. **F, G.** GO enrichment analysis of the 1843 downregulated (F) and 1580 upregulated genes (G) in Δ3–7 human induced pluripotent stem cell-cardiomyocytes. Abbreviations: HCM, hypertrophic cardiomyopathy; DCM, dilated cardiomyopathy; ACM, arrhythmogenic cardiomyopathy; CMs, cardiomyocytes; ECM, extracellular matrix.

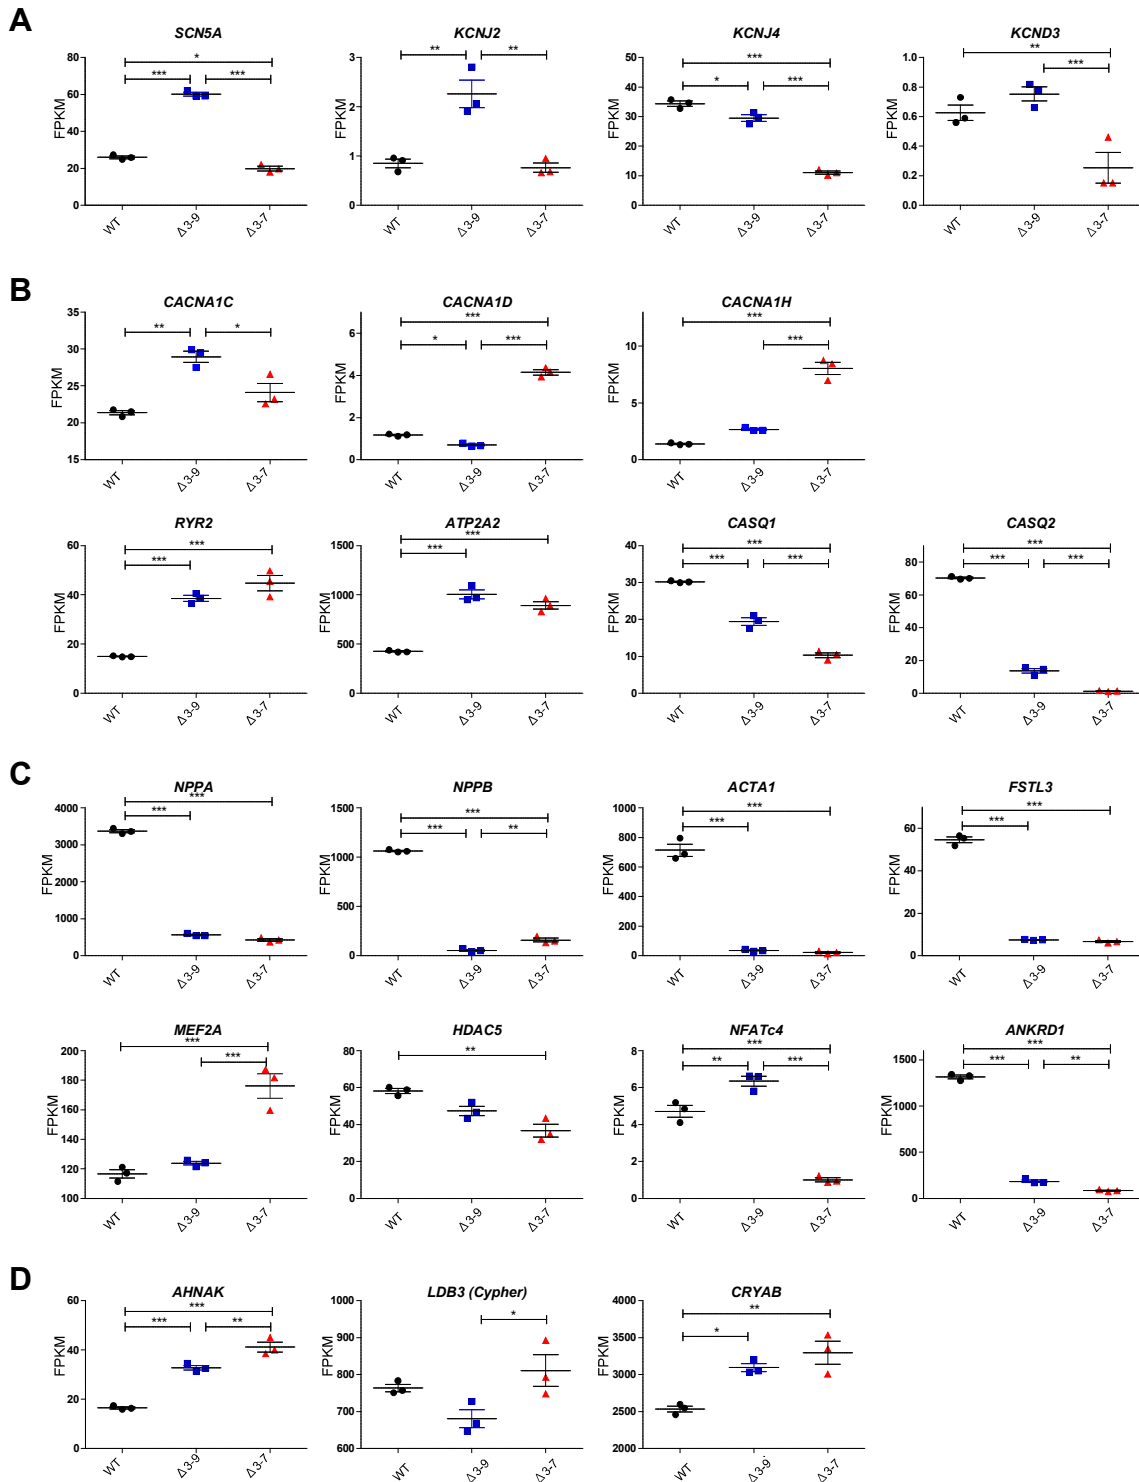

**Figure S8. RNA-seq data, related to Figure 5.**

**A.** Action potential associated gene expression (FPKM). **B.** Calcium handling-associated gene expression (FPKM). **C.** Fetal gene and cardiac hypertrophy-related gene expression (FPKM). **D.** Dystrophin-associated cardioprotective gene expression (FPKM). Data are presented as mean  $\pm$  SEM. \* $P < 0.05$ , \*\* $P < 0.01$ , \*\*\* $P < 0.005$ .

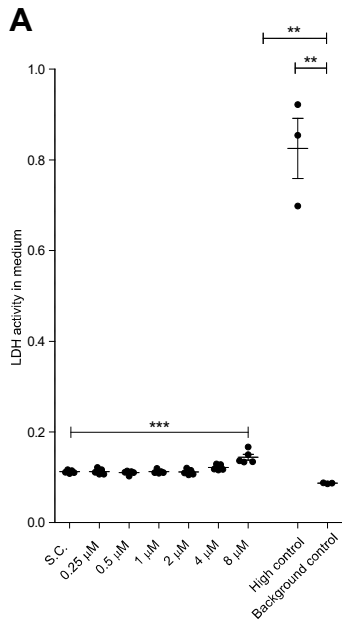

**Figure S9. Lactate dehydrogenase (LDH) assay on  $\Delta$ 3–7 human induced pluripotent stem cell-cardiomyocytes (hiPSC-CMs) treated with Vivo-Morpholinos.**

**A.** LDH release level after 12-h incubation with different concentrations of Vivo-Morpholinos (n=5) and Vivo-standard control (S.C.). The high control is the maximum LDH release from the  $\Delta$ 3–7 hiPSC-CMs treated with lysis buffer, and the background control is LDH activity in the culture medium (n=3).

Data are presented as mean  $\pm$  SEM. \*\* $P < 0.01$ , \*\*\* $P < 0.005$ .

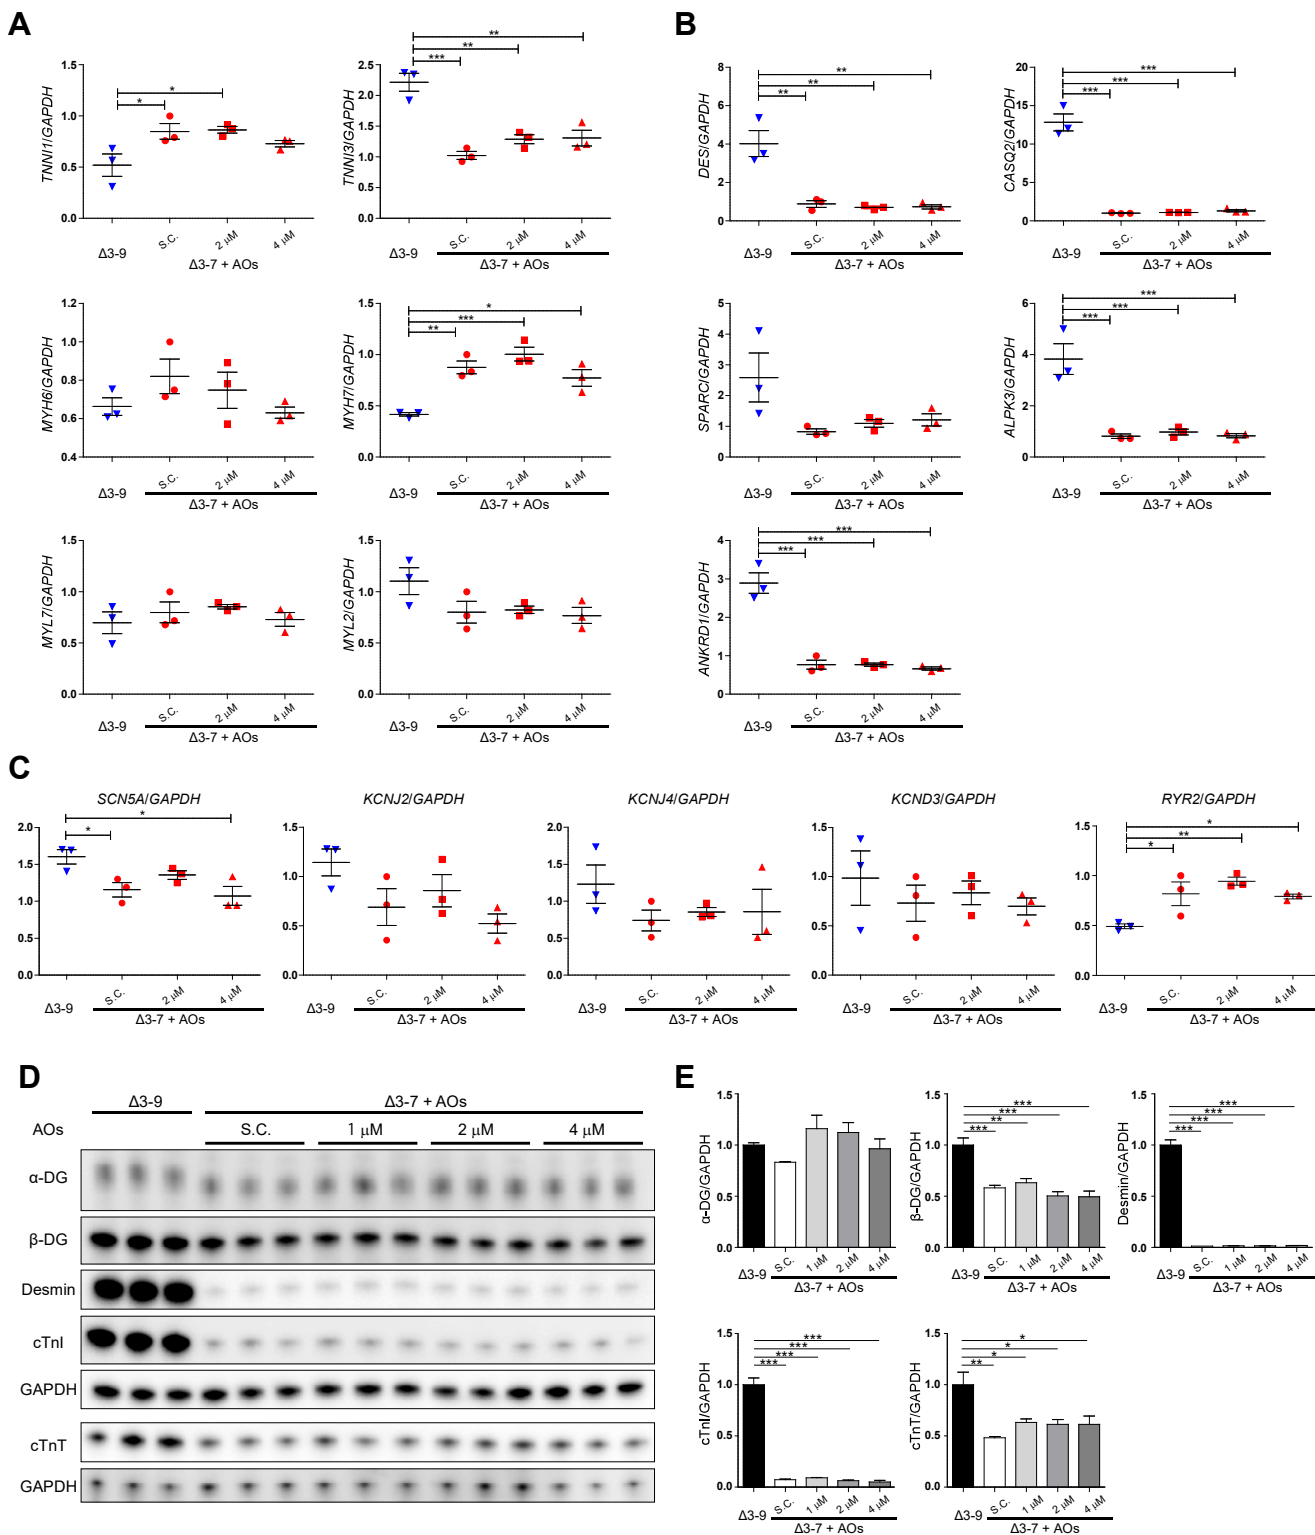

**Figure S10. mRNA and protein expression of human induced pluripotent stem cell-cardiomyocytes (hiPSC-CMs) 14 d after exon skipping.**

**A.** RT-PCR analysis of maturation marker genes, including *TNNI3*, *TNNI1*, *MYH7*, *MYH6*, *MYL2*, and *MYL7*, from untreated  $\Delta 3-9$  and  $\Delta 3-7$  hiPSC-CMs 14 d after administration of Vivo-standard control (S.C.) and Vivo-Morpholinos at 1.0–4.0  $\mu\text{M}$ . **B.** RT-PCR analysis of selected genes that were significantly downregulated in day 48  $\Delta 3-7$  hiPSC-CMs compared with those in  $\Delta 3-9$  and wild-type (WT) from untreated  $\Delta 3-9$  hiPSC-CMs and  $\Delta 3-7$  hiPSC-CMs 14 d after the administration of S.C. and Vivo-Morpholinos at 1.0–4.0  $\mu\text{M}$ . **C.** RT-PCR analysis of channel genes related to action potential from untreated  $\Delta 3-9$  hiPSC-CMs and  $\Delta 3-7$  hiPSC-CMs 14 d after the administration of S.C. and Vivo-Morpholinos at 1.0–4.0  $\mu\text{M}$ . **D.** Western blot analysis showing protein levels of dystrophin-glycoprotein complex composing proteins, including  $\alpha$ -DG and  $\beta$ -DG, desmin, cardiac troponin T (cTnT), and cardiac troponin I (cTnI), in  $\Delta 3-9$  and  $\Delta 3-7$  hiPSC-CMs 14 d after administration of S.C. and Vivo-Morpholinos at 1.0–4.0  $\mu\text{M}$ . **E.** Quantification of protein expression in **D**. Data are presented as mean  $\pm$  SEM. \* $P < 0.05$ , \*\* $P < 0.01$ , \*\*\* $P < 0.005$ .
